# Supplementary material for: Pooled Sequencing Analysis of Geese (Anser cygnoides) Reveals Genomic Variations Associated With Feather Color
Source: Front Genet. 2021 Jun 18;12:650013. doi: 10.3389/fgene.2021.650013 (PMC8249929; doi:10.3389/fgene.2021.650013)
Supplement: Supplementary file 1 [file Table_1.XLSX]

## Sheet: Sheet1
Supplementary Table S1 | Primers used in this study
SNP code	Gene symbol and position	Primer (5’- 3’)	Product size (bp)
SNP01-05	LOC106047492 (cds, 1, 79, 86; intron, 737940, 737941)	F: GTCTCCTGCAGAAAGCAGCC	322
		R: CCAAAGCCAATGAGCCACCT
SNP06-10	LOC106047492 (cds, 144，147; intron, 738282,738283, 738415)	F: AGCCTTACCGCACCTCTTCT	319
		R: GTAAGTGCCCTCTGGGTCCT
SNP11	LOC106047489 (intron, 690476)	F: AACGCTGAGGTAAATCGCTA	909
		R: GACCACCAAAAACGCTAACT
SNP12	LOC106047519 (cds,708)	F: ACACACACCTTCCAGACCCC	425
		R: GCTGCTCTCCCCAGATTCAC
SNP13-14	UBE2F (intron, 2345611, 2345688)	F: CAAACGGGACTGAGATGTAG	1133
		R: CACACAGTGCAGTAGTTGGC
SNP15	LOC106043449 (intron, 2240886)	F: GGGTTTCAGCGGTAGCAGGT	633
		R: ACAAACTCCAGCCATCAGGG
SNP16-17	CYYR1 (3’UTR, 4221545, 4221597)	F: AAACTTTCTCGTCACCCCCT	531
		R: AACTGTGGAACATCCGTCTTAG
SNP18	CYYR1 (3’UTR, 4222954)	F: AAAGTTCCTCCAAGTCAGTG	833
		R: TAGAGTTTTAGAATGCCCAG
SNP19	MXRA7 (intron, 675290)	F: AGTTTCACTGCTTTTGGGGT	417
		R: GGATTTTGTCAGAGCGGTAT
SNP20	LOC106029431 (intron, 33131)	F: CTGGGGTTAGACTGACACGA	577
		R: TGTGCTCCCTAAGAACGAAT
SNP21	LOC106042460 (intron, 1829205)	F: ACAACACGCTTGAATGGCTC	359
		R: AGAACAGACACTGAAGGCTAAACT
SNP22	MAML3 (intron, 176032)	F: TCAGAAAAATGTTGCCACC	725
		R: AAAGCCCGCAGAAGGTAT
SNP23	MRPS18A (cds, 198)	F: TTCAAGGCACAGTAGTTCAAAG	595
		R: GCAGAGATGGAGTTACCTAT
SNP24-25	KITLG (3’UTR, 232853, 232854)	F: CCCGAAGTGGACTCAAAATTATACC	399
		R: TTTGCTCCCTCTTCCCTGAG
SNP26	MITF (5’UTR, 4400553)	F: GCAAGCAGAATCTGATCC	595
		R: AAACAATGCACTCCAACAAC
SNP27	TYRO3 (cds, 2638)	F: ATCACCGTCCGTGTTTCCG	345
		R: GCTGGCTCCACTCACCTTCT
SNP28	KIT (cds, 2659)	F: TGCGTTTACACTTTTGAGA	565
		R: TGACACGGAGCAGATACCA
F, forward primer; R, reverse primer.
