# Supplementary material for: Pooled Sequencing Analysis of Geese (Anser cygnoides) Reveals Genomic Variations Associated With Feather Color
Source: Front Genet. 2021 Jun 18;12:650013. doi: 10.3389/fgene.2021.650013 (PMC8249929; doi:10.3389/fgene.2021.650013)
Supplement: Supplementary file 2 [file Table_2.XLSX]

## Sheet: Sheet1
Supplementary Table S2 | Allele frequency (AF) comparison between Sanger sequencing and Pool-Seq.
SNP code	SNP information1	Gene symbol	Number2	Sanger sequencing AF			Pool-Seq AF			P-value3
				Grey	White_1	White_2	Grey	White_1	White_2	Grey vs. White_1	Grey vs. White_2
SNP01	NW_013185915.1:cds_A1C: M1L	LOC106047492	110|25|74	0.2	1	1	0.16	1	1	3.88e-21	3.36e-20
SNP02	NW_013185915.1:cds_A79G: S27G	LOC106047492	110|25|74	0.46	1	1	0.38	1	1	2.03e-10	8.3e-13
SNP03	NW_013185915.1: cds_C86T: P29L	LOC106047492	111|25|74	0.46	1	1	0.39	1	1	3.94e-10	1.59e-11
SNP04	NW_013185915.1: intron_G737940C	LOC106047492	109|25|74	0.47	1	1	0.43	1	1	1.15e-09	2.23e-11
SNP05	NW_013185915.1: intron_T737941A	LOC106047492	109|25|74	0.51	1	1	0.55	1	1	2.94e-07	1.53e-08
SNP06	NW_013185915.1: cds_T144C: H48H	LOC106047492	109|25|75	0.21	1	1	0.13	1	1	1.74e-16	1.89e-18
SNP07	NW_013185915.1: cds_C147T: D49D	LOC106047492	109|25|76	0.69	1	1	0.7	1	1	0.000349	0.000102
SNP08	NW_013185915.1: intron_T738282C	LOC106047492	109|25|75	0.22	1	1	0.19	1	1	7.71e-15	2.21e-16
SNP09	NW_013185915.1: intron_G738283A	LOC106047492	109|25|77	0.65	1	1	0.82	1	1	0.00833	0.00583
SNP10	NW_013185915.1: intron_C738415A	LOC106047492	109|25|75	0.68	1	1	0.71	1	1	0.000374	0.000356
SNP11	NW_013185915.1: intron_A690476C	LOC106047489	107|25|71	0.11	0.8	0.94	0.07	0.77	1	1.8e-12	5.52e-23
SNP12	NW_013185915.1: cds_A708G: I236I	LOC106047519	113|25|82	0.11	1	1	0.1	1	1	2.23e-19	1.49e-17
SNP13	NW_013185684.1: intron_C2345611T	UBE2F	110|25|83	0.18	0.44	0.92	0.12	0.38	1	0.016	6.45e-18
SNP14	NW_013185684.1: intron_G2345688A	UBE2F	110|25|85	0.18	0.44	0.92	0.05	0.28	1	0.00534	1.75e-25
SNP15	NW_013185799.1: intron_A2240886G	LOC106043449	100|25|79	0.23	0.52	0.91	0.11	0.44	1	0.000635	9.36e-23
SNP16	NW_013185707.1: 3’UTR_C4221545T	CYYR1	99|25|64	0.92	0.64	0.11	1	0.84	0.04	0.00513	3.81e-25
SNP17	NW_013185707.1: 3’UTR_G4221597A	CYYR1	103|25|67	0.9	0.6	0.1	1	0.85	0.07	0.00422	4.4e-27
SNP18	NW_013185707.1: 3’UTR_G4222954A	CYYR1	113|25|82	0.89	0.64	0.1	1	0.8	0.09	0.00254	2.48e-22
SNP19	NW_013185685.1: intron_G6752901T	MXRA7	113|25|79	0.63	0.52	0.04	1	0.45	0.06	8.94e-09	4.31e-23
SNP20	NW_013186170.1: intron_T33131C	LOC106029431	112|25|76	0.77	0.7	0.13	1	0.76	0.04	0.00195	2.98e-22
SNP21	NW_013185778.1: intron_A1829205G	LOC106042460	99|25|69	0.8	0.68	0.17	1	0.76	0.03	0.000477	1.32e-22
SNP22	NW_013185751.1: intron_T176032C	MAML3	112|25|77	0.83	0.68	0.18	1	0.88	0.09	0.0161	2.35e-22
SNP23	NW_013185659.1: cds_C198T: L66L	MRPS18A	104|25|68	0.83	0.7	0.21	1	0.82	0.08	0.0178	4.13e-17
SNP24	NW_013185706.1: 3’UTR_G232853A	KITLG	114|25|84	0.66	0.94	1	0.79	1	1	0.0096	0.00296
SNP25	NW_013185706.1: 3’UTR_C232854T	KITLG	114|25|84	0.66	0.94	1	0.79	1	1	0.00854	0.00296
SNP26	NW_013185692.1: 5’UTR_G4400553C	MITF	112|25|83	0.87	0.58	0.46	1	0.68	0.41	1.38e-05	1.52e-07
SNP27	NW_013185657.1: cds_A2638G:S772G	TYRO3	107|25|86	0.64	0.9	1	0.88	0.91	1	1.03e-05	NA
SNP28	NW_013185664.1: cds_A2659G:T887A	KIT	102|25|78	0.33	0.04	0	0.12	0.09	0	0.00397	NA
1SNP information is displayed in the following format: NCBI GenBank accession number: nucleotide position in the goose reference genome (cds, 5’UTR, 3’UTR or intron) + nucleotide in the reference genome (reference nucleotide) + SNP position in the transcript + mutant nucleotide: amino acid in the goose reference transcript + codon position in the transcript + amino acid mutation or no change.
2Numbers of individuals (Grey|White_1|White_2) for which reliable genotypes could be inferred from the Sanger sequencing data.
3P-values were obtained from the significant analysis using Pool-Seq data.
NA represents the insignificant P-value (P < 0.05) in the comparison between Grey and White_2.
Sanger sequencing AF, Allele frequency of the reference nucleotide detected by Sanger sequencing.
Pool-Seq AF, Allele frequency of the reference nucleotide detected by population genome sequencing.
